# Supplementary material for: Integrated modeling of the Nexin-dynein regulatory complex reveals its regulatory mechanism
Source: Springer Nature journal article supplement (doi:10.1038/s41467-023-41480-7), 2023-09-15
Supplement: MOESM1 [file 41467_2023_41480_MOESM1_ESM.pdf]

# Supplementary Information

Ghanaeian et al. Integrated modeling of the Nexin-dynein regulatory complex reveals its regulatory mechanism. *Nat Commun*, 2023

**Table of content**

Supplementary Figures .....2

Supplementary Tables..... 11

Supplementary Movies .....20

References.....21

## Supplementary Figures

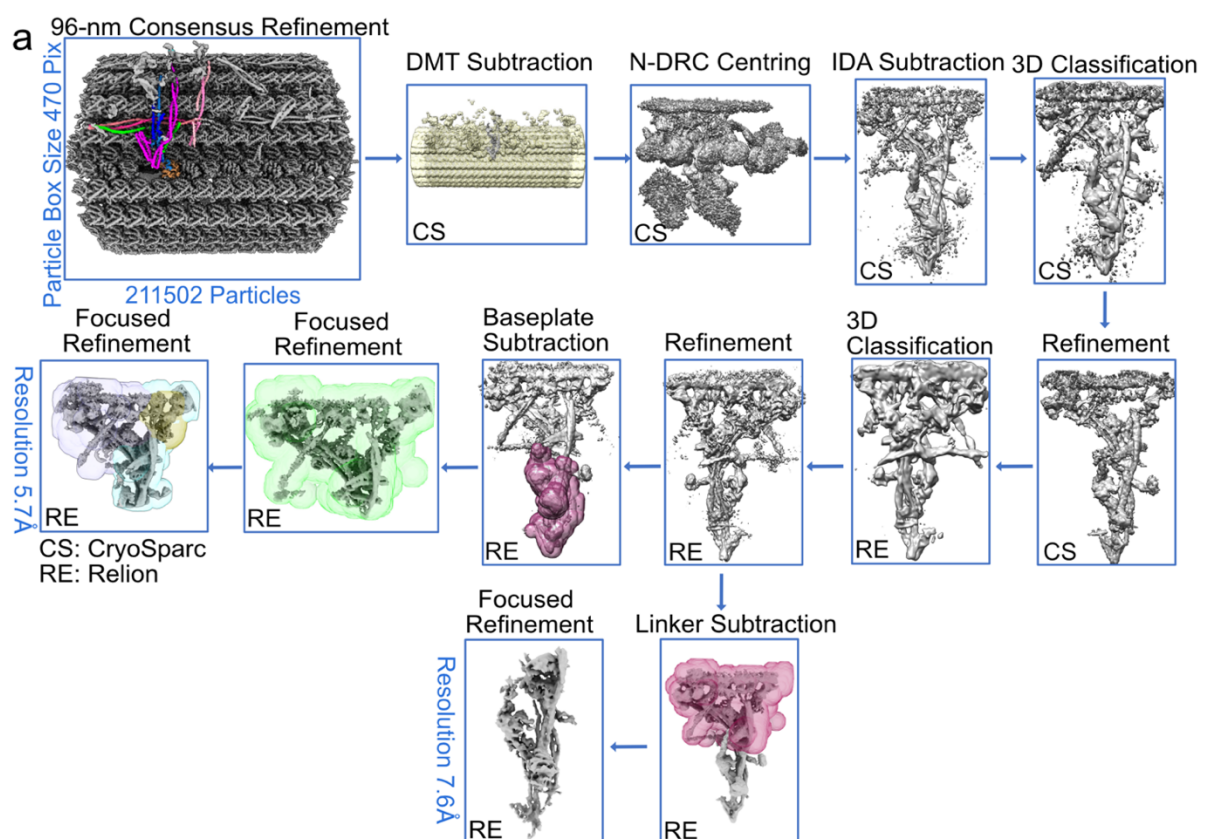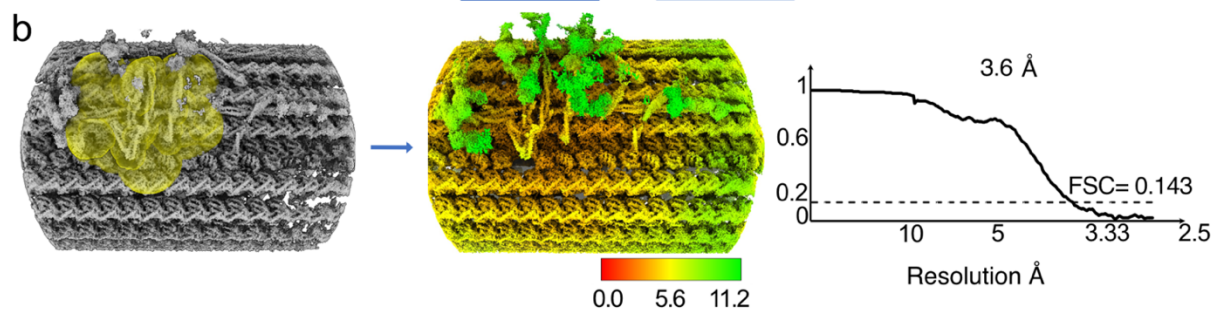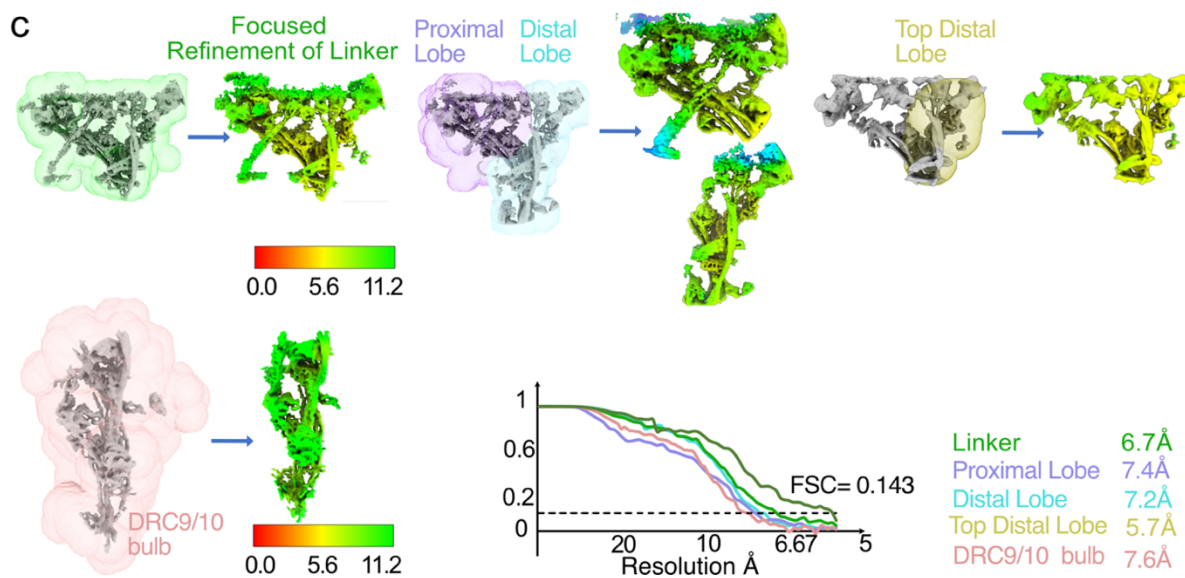

**Supplementary Figure 1. The workflow for reconstruction of the base plate and linker regions of the N-DRC.** **a** The overall workflow for reconstruction of the N-DRC. DMT signal was subtracted, and N-DRC was centered. After refinement, the IDA signal was subtracted. In the next step, the N-DRC structure underwent several 3D classifications and refinements in Cryosparc (CS) and Relion (RE). To resolve the linker domain, the baseplate signal was subtracted, and a consensus refinement was performed using a mask covering the entire linker domain. Finally, focused refinement was conducted on the distal and proximal lobes of the N-DRC. To resolve the bulb of the DRC9/10 structure, the linker domain signal was subtracted, and the remaining structure underwent focused refinement. **b** Refinement of the base plate region. The mask is shown as a transparent density (left panel). The resulting map is shown in the middle panel. The Fourier Shell Correlation of the baseplate domain of the N-DRC cryo-EM map shows 3.6 Å resolution (right panel). **c** Refinement of the linker region. The linker region resolved at 6.7 Å. The distal and proximal lobes have 7.2 Å and 7.4 Å resolution, respectively. The top distal lobe resolved at 5.7 Å. Last, the bulb of the DRC9/10 resolved at 7.6 Å.

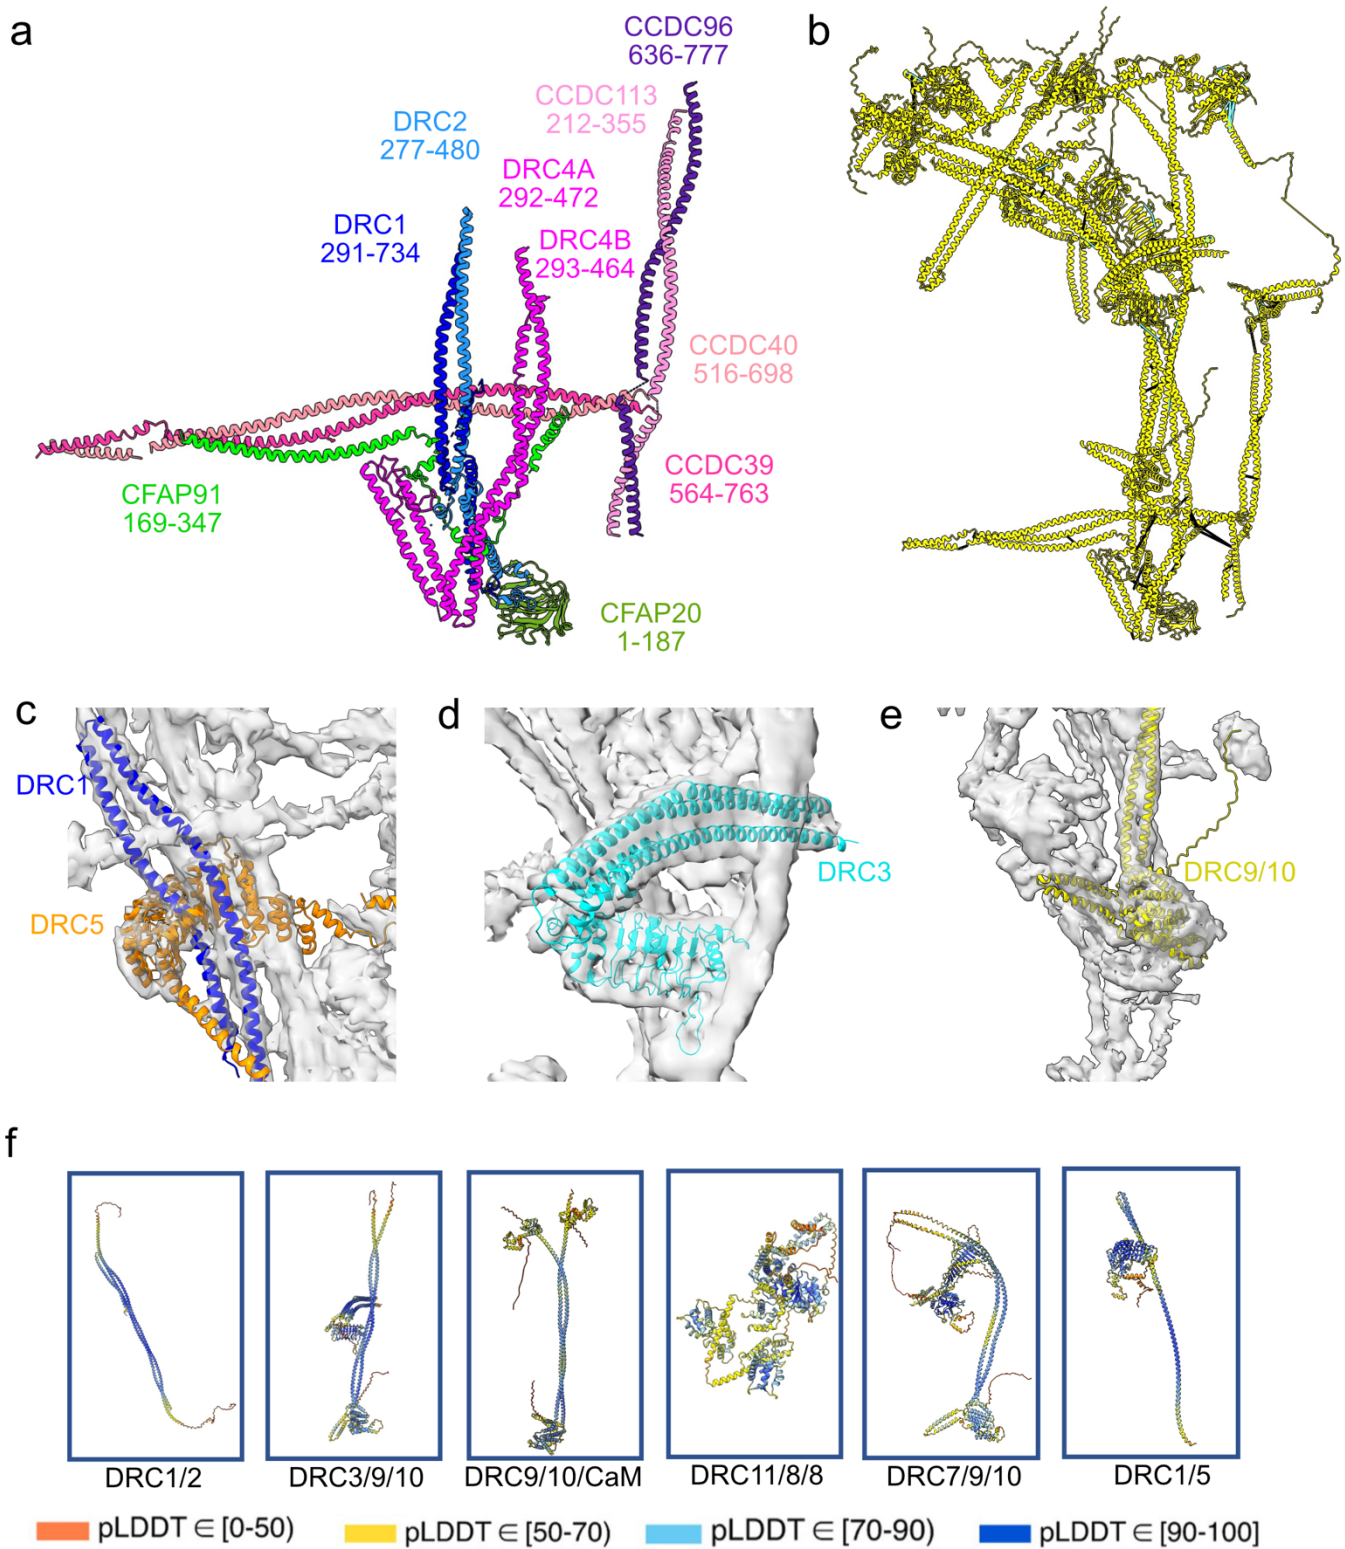

**Supplementary Figure 2. AlphaFold2 modelling of all N-DRC components.** **a** The protein parts in the baseplate part were modelled using Coot. **b** The intra-molecular (cyan lines) and inter-molecular (black lines) cross-links are identified in the N-DRC. **c** Fitting of DRC1 and DRC5 in the linker map. **d** DRC3 was fitted as a bundle of coiled-coil structures in the N-DRC linker map. **e** The DRC9/10 N-terminus is fitted to the N-DRC map. **f** The AlphaFold2 Multimer models of the DRC proteins and CCDC96/113 are coloured based on the pLDDT score where blue shows the highest score, and orange represents the lowest score.



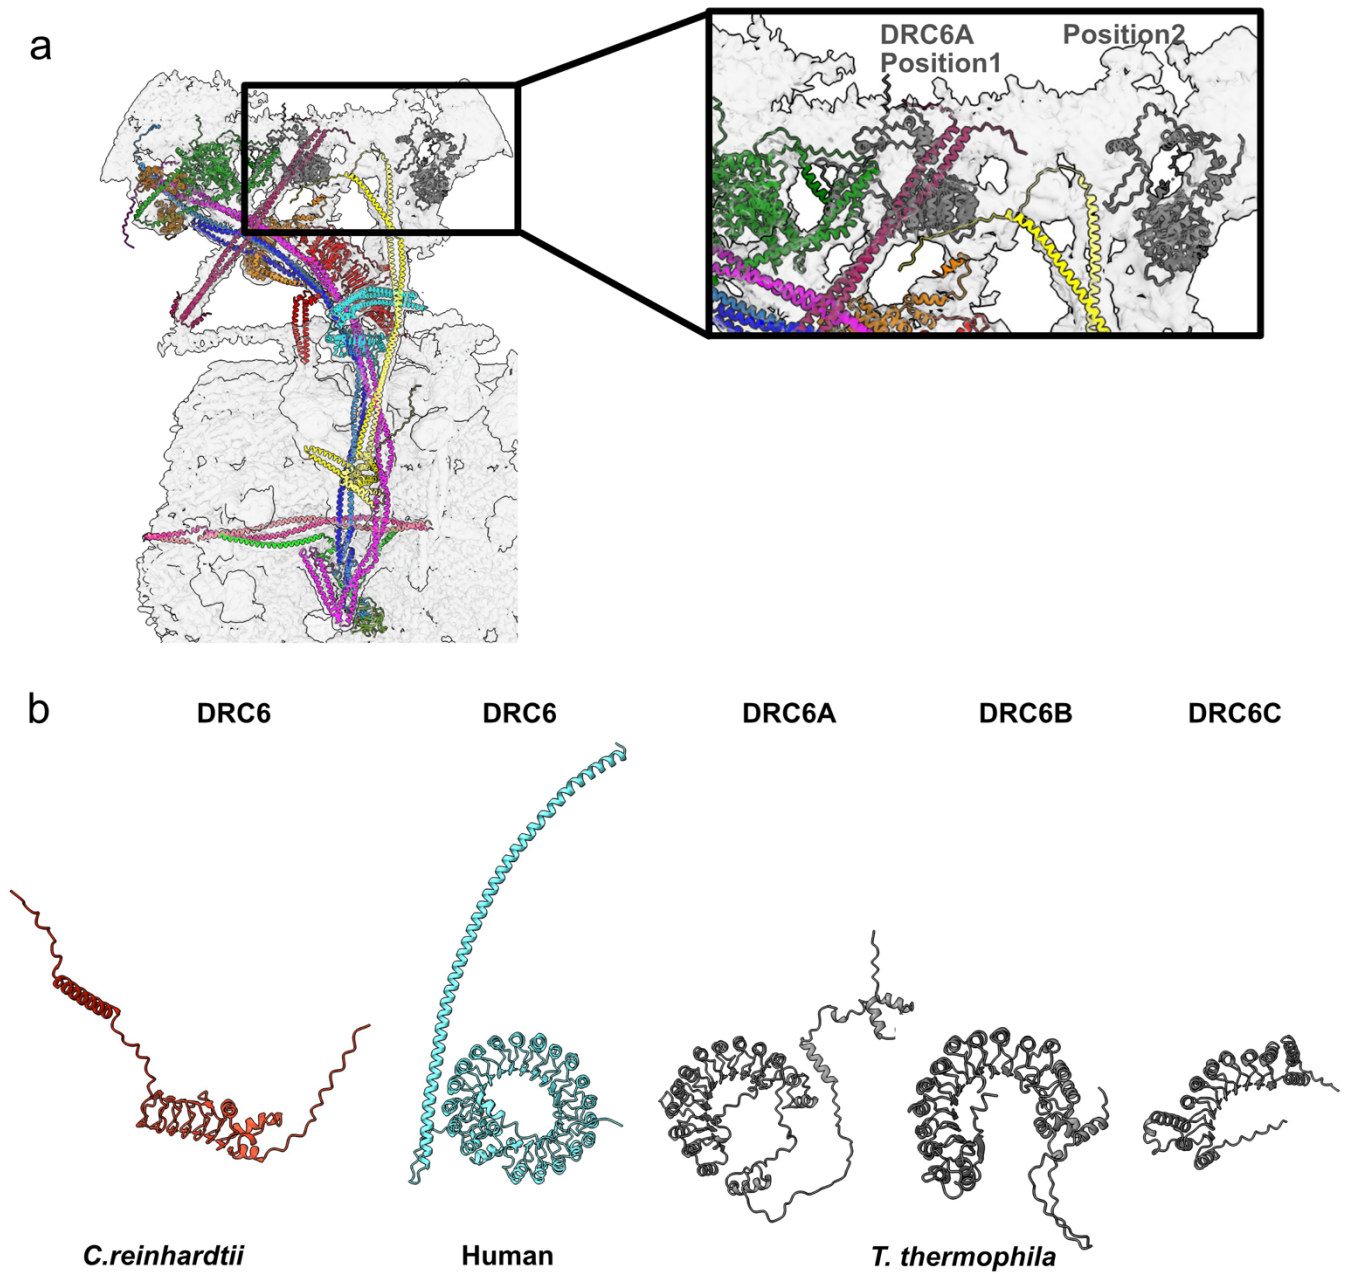

**Supplementary Figure 3. Localizing DRC6A in the N-DRC.** **a** Two potential locations for DRC6A in the cryo-EM map identified by integrated modelling. **b** The structure of DRC6 in three different species. There are three paralogs of DRC6 (A/B/C) in *T. thermophila*.

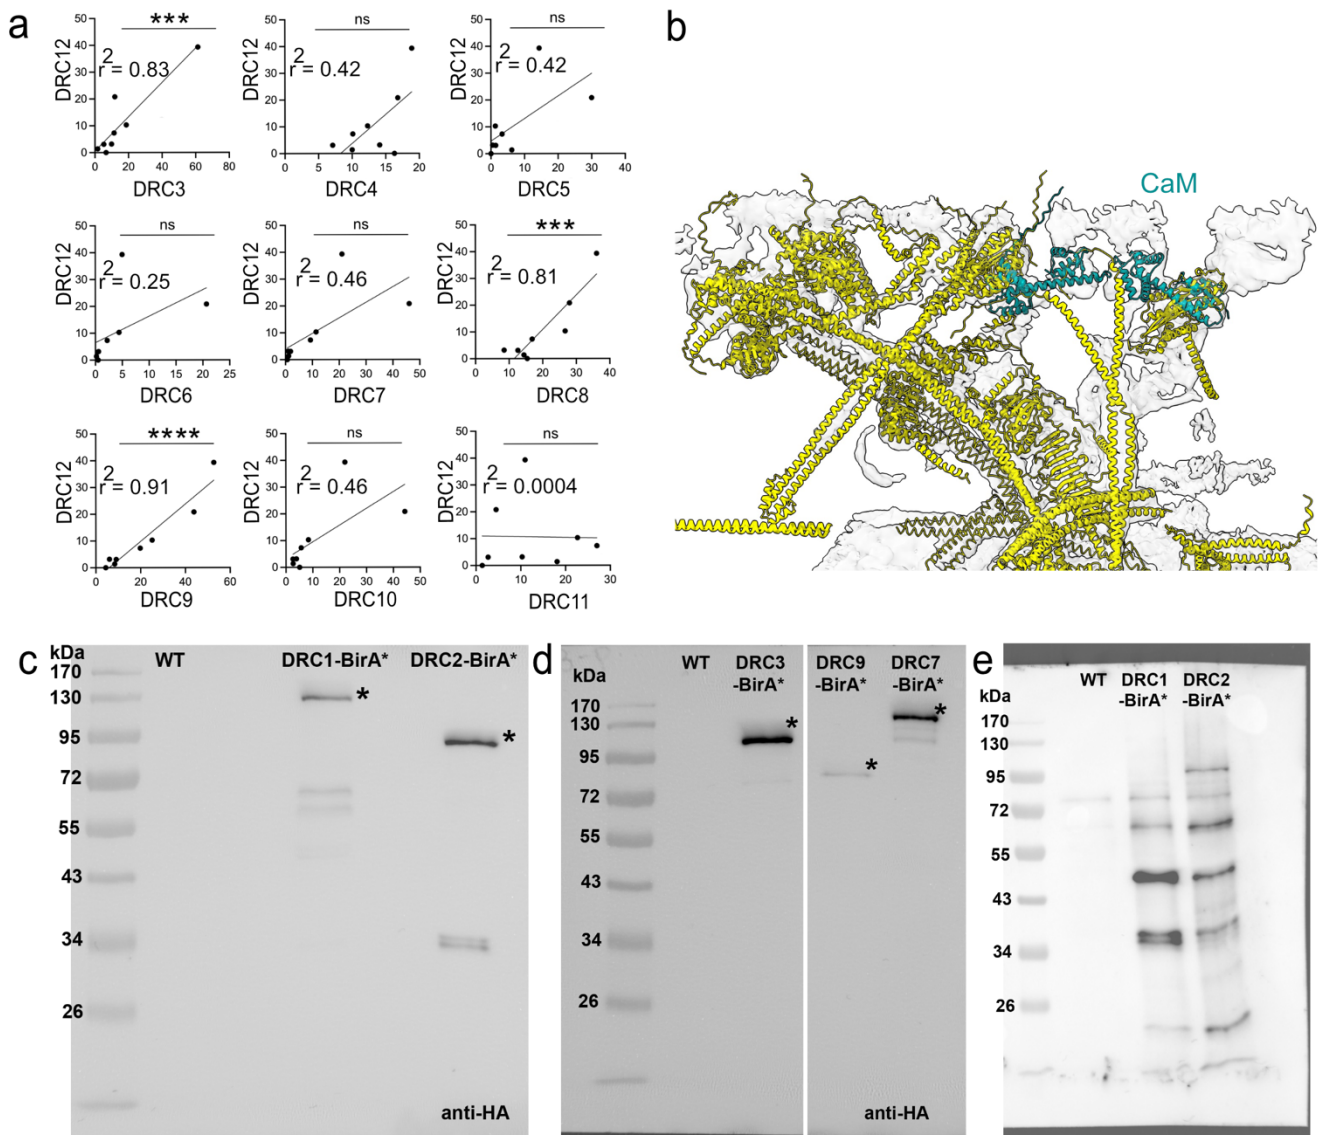

**Supplementary Figure 4. Identification of new N-DRC components.** **a** Correlation graphs of consensus normalized RNA expression levels for DRC components vs. the newly identified DRC12. The coefficient of determination ( $R^2$ ) of the linear regression is indicated.  $*p < 0.05$ ;  $***p < 0.001$ ;  $****p < 0.0001$ ; ns: Not Significant. **b** The approximate localization of calmodulin in the N-DRC structure. **c-e** Western blots with HA antibody of purified cilia from WT, DRC1-HA-BirA\* and DRC2-HA-BirA\* cells (**c**) and DRC3-HA-BirA\*, DRC7-HA-BirA\* and DRC9-HA-BirA\* (**d**) indicate the baits are in the cilia. **e** Western blots using Streptavidin-HRP of purified cilia from WT, DRC1-HA-BirA\* and DRC2-HA-BirA\* cells after 4 h incubation with 50  $\mu$ M biotin at 30°C showed that biotinylation of ciliary components happens. The Western blot experiments were conducted with a rigorous approach to ensure the reliability of the results. Each experiment was independently repeated a minimum of two to three times.

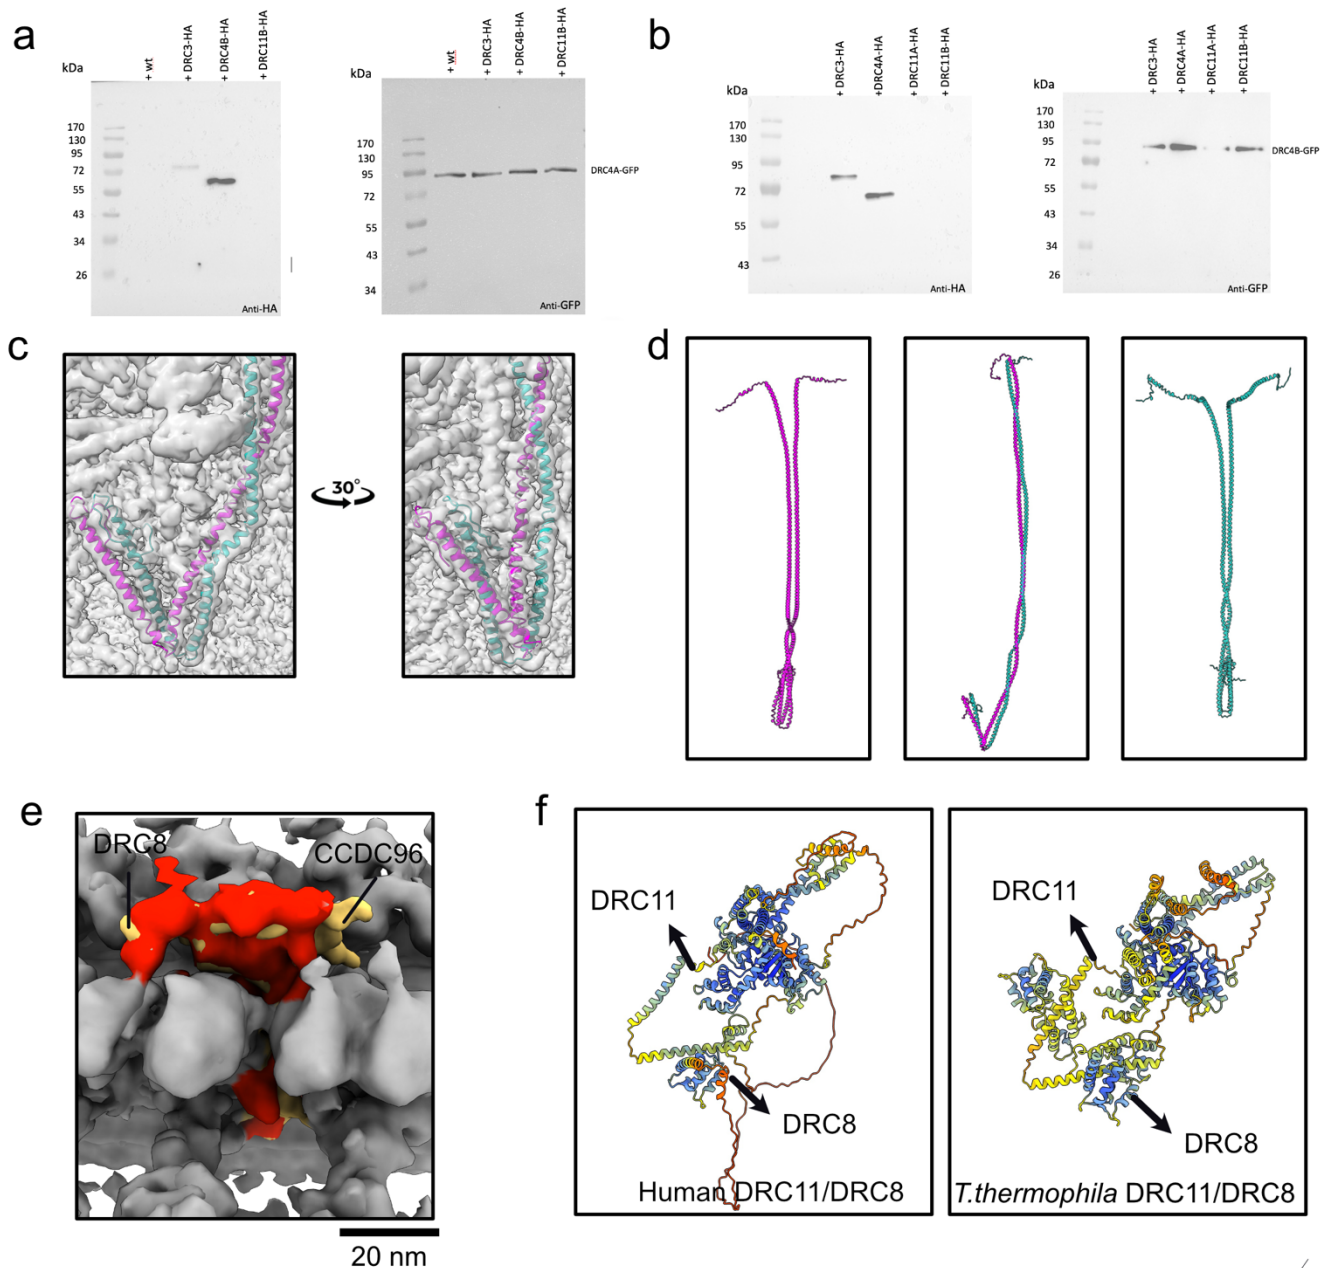

**Supplementary Figure 5. The interaction of DRC4 paralogs in the N-DRC.** **a-b** Western blots using HA and GFP antibodies showed proteins pulled down by (A) DRC4A-GFP or (B) DRC4B-GFP bound to anti-GFP beads. The pull-down assays indicate that DRC4A interacts with DRC4B. DRC4B seems to interact strongly with DRC3 compared to DRC4A. Each Western blot experiment was repeated three times to ensure the reproducibility and validity of the results. **c** The green and magenta colours show the parts of DRC4A and DRC4B modelled by Coot in the base plate, respectively. **d** The AlphaFold2 Multimer model of DRC4B/DRC4B, DRC4A/DRC4B, and DRC4A/DRC4A. The prediction of DRC4A/DRC4B complex is the most similar to the structure observed in the base plate region. These two proteins are different in sequence with an identity score of 25.39. **e** Superimposed subtomogram averaged map of the DMT from human (EMD-5950) (red) and *T. thermophila* (yellow). The larger density in the proximal and distal lobes of the *T. thermophila* map indicates the second copy of DRC8 and N-terminus of CCDC96, respectively, because the human map lacks those densities. Scale bar, 20 nm. **f** The AlphaFold2 Multimer prediction of DRC11/DRC8 subcomplex for humans and *T. thermophila*. The AlphaFold2 prediction indicates only one copy of DRC8 binds to DRC11 in humans while two copies of DRC8 bind to DRC11 in *T. thermophila*. The AlphaFold2 models are coloured based on the pLDDT score in which blue represents the highest confidence and orange represents the lowest confidence.



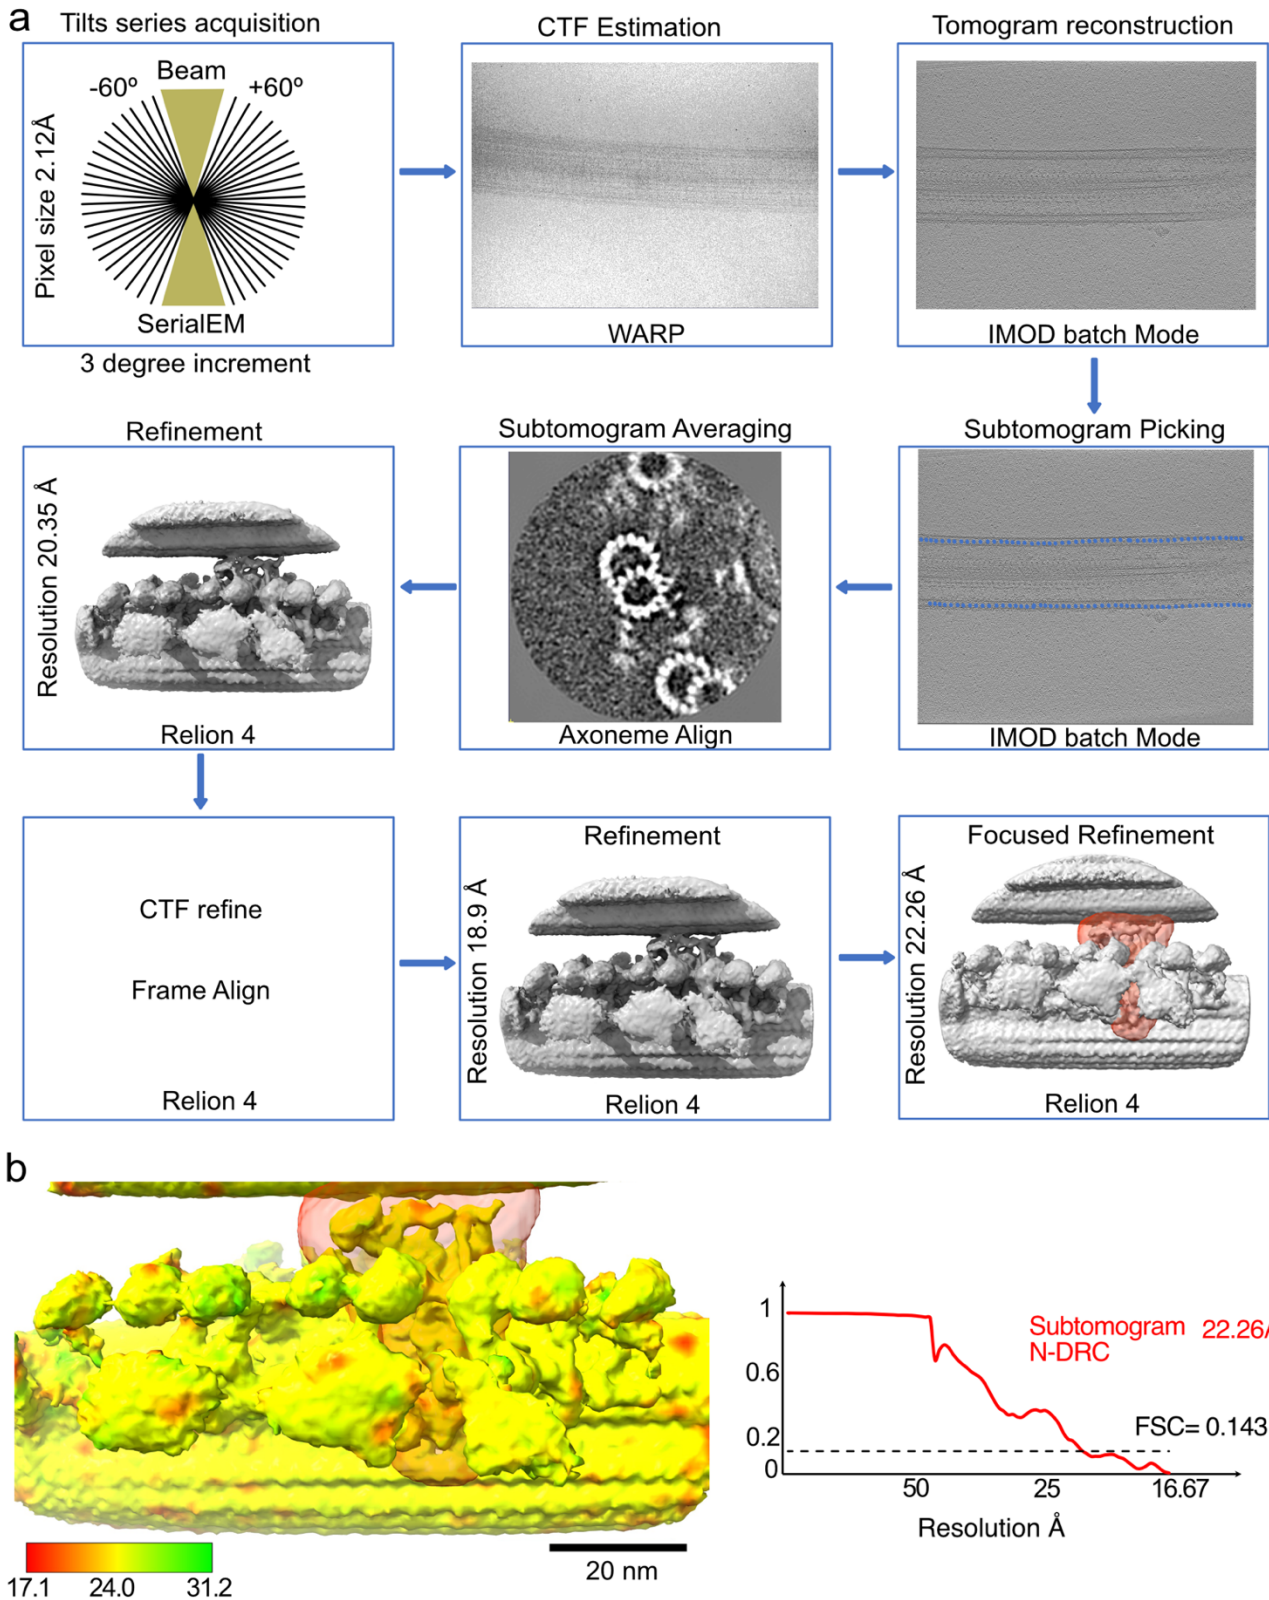

**Supplementary Figure 6. The workflow of cryo-ET and subtomogram averaging of the WT cilia. a** Tilt series were acquired using dose-symmetric scheme ranging from -60 to 60 degrees in 3-degree increment. Then, CTF estimation of the tilt series was performed in WARP. The tomogram reconstruction was done using IMOD batch mode. Then, subtomogram picking and subtomogram averaging for the 96nm repeat of the DMT were done using IMOD and Axoneme Align software. The alignment parameters were then converted into Relion 4 star files for refinement. Within Relion 4, CTF refinement and frame alignment were done before the final 96-nm DMT refinement and focused refinement of the N-DRC region. **b** The local resolution estimation of the subtomogram average of the N-DRC. The Fourier Shell Correlation shows a global resolution of 22.26 Å of the subtomogram average. Scale bar, 20 nm.

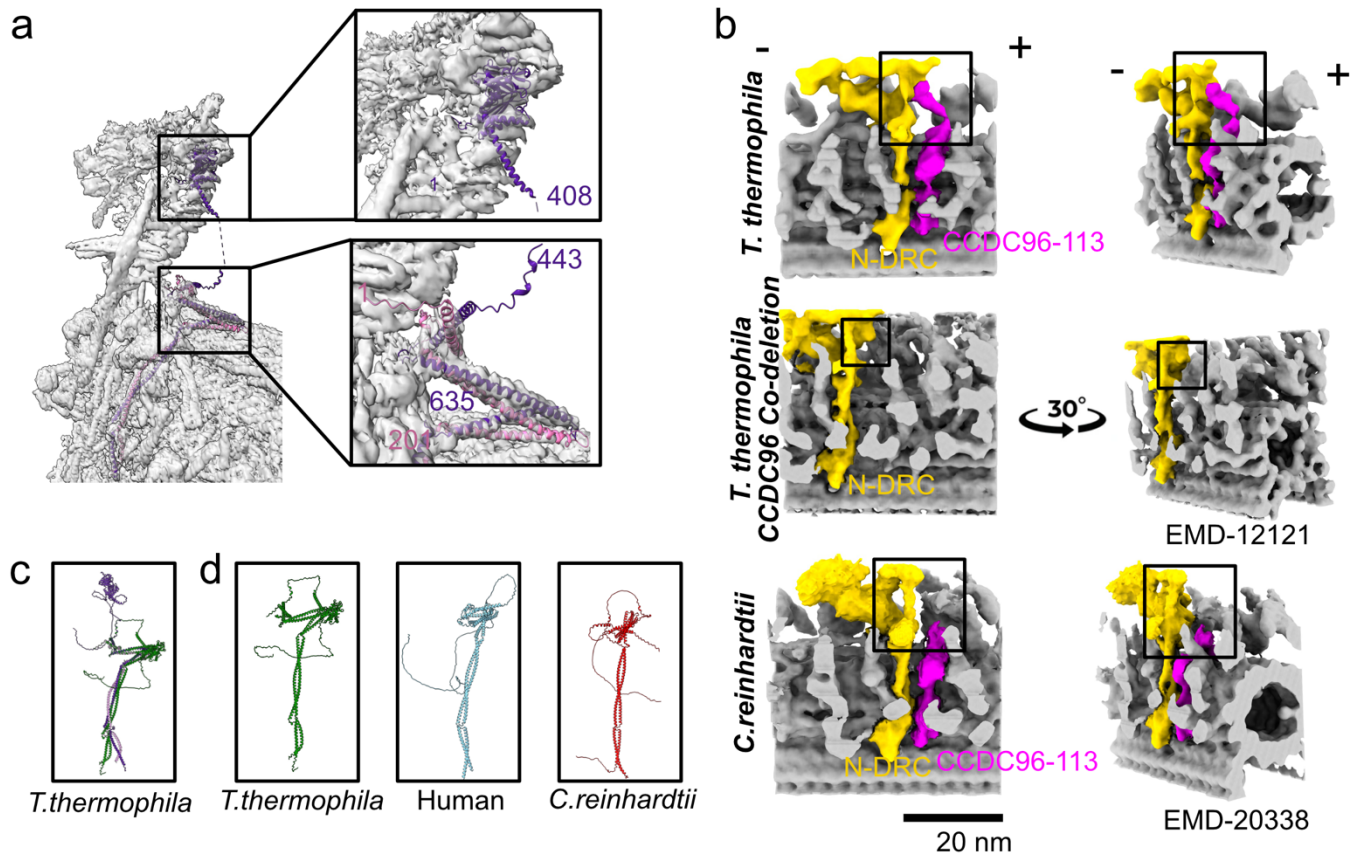

**Supplementary Figure 7. The structure of the CCDC96/113 complex.** **a** Fitting the N-terminal domain of CCDC96 in the cryo-EM map of the linker region. The numbers represent the amino acid number in the CCDC96 sequence. **b** The cryo-ET maps of the 96-nm DMT from *T. thermophila* wild-type, *T. thermophila* CCDC96 Co-Deletion (EMD-12121), and *C. reinhardtii* (EMD-20338) show that only in the *T. thermophila* WT map, there is a density connecting the CCDC96/113 complex (purple) to the N-DRC (yellow). This density is likely to correspond to the non-conserved N-terminus of CCDC96 in *T. thermophila*. The IDAs are deleted for better visualization. Signs (+) and (-) indicate the distal and proximal ends of the DMT. **c** AlphaFold2 multimer prediction of CCDC96/113 complexes from *T. thermophila*. Green colour indicates AphaFold2 multimer structure before truncation and refinement. The purple colour shows protein after truncation and refinement. **d** AlphaFold2 multimer prediction of CCDC96/113 complexes from *T. thermophila*, human and *C. reinhardtii* show that *T. thermophila* CCDC96 has an extra N-terminal globular domain. Scale bar, 20 nm.



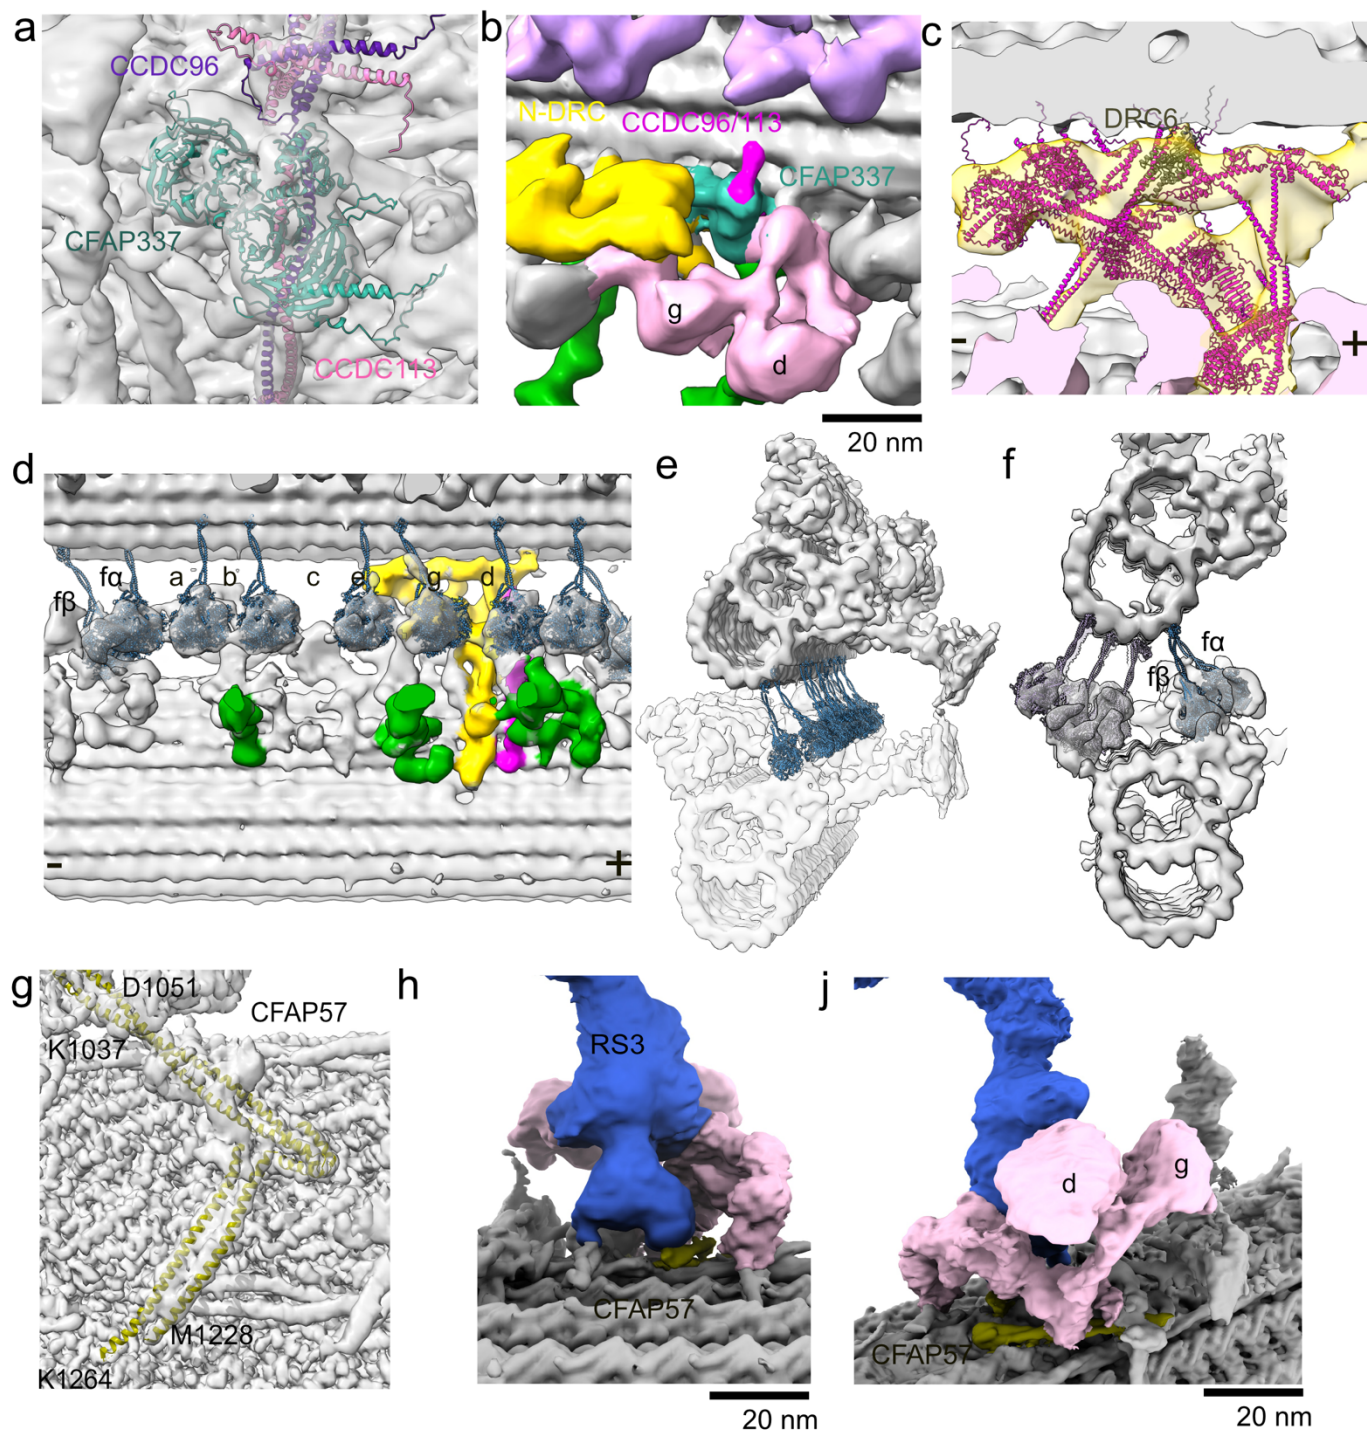

**Supplementary Figure 8. Identifications and interactions of N-DRC associated proteins.** **a** Fitting the AlphaFold2 predicted structure of CFAP337 in the cryo-EM map showing potential interactions with CCDC96/113. **b** The subtomogram average shows that CFAP337 (turquoise) interacts with CCDC96/113 (purple) and stems of dyneins g and d (light pink). The N-DRC is in yellow. Scale bar, 20 nm. **c** Fitting of the N-DRC pseudo-atomic model in the subtomogram average showing the potential interactions of the flexible loops with the adjacent DMT. **d** Fitting of dynein heavy chains into the IDA densities in the subtomogram average. Colors: N-DRC, yellow; RS, green; CCDC96/113, purple. Signs (+) and (-) indicate the distal and proximal ends of the DMT. **e** The stalks of IDAs contact protofilaments B10 and B9. **f** Cross-sectional view shows that the stalks of dyneins f $\alpha$  and f $\beta$  binding to protofilament B9. **g** Fitting of AlphaFold2 Multimer predicted model of CFAP57A/C (UniProtID Q234G8 and W7WWA2) into the cryo-EM map shows CFAP57A/C coiled coil region interacts with stem of dyneins d and g. **h, j** Part of CFAP57A/C coiled coil interacts with the base of the RS3. Colors: CFAP57A/C coiled coil, green; RS3, blue; dynein, light pink. Scale bar, 20 nm.

## Supplementary Tables

**Supplementary Table 1.** The method of localizing and modelling of DRC components in cryo-EM maps.

| DRC subunits | UniProt ID | Gene name       | Region Coot Model | Region AF localizing | Localization rationales                                                                                                                                                                                                                                                                                                                                                                                                                                                                                                                                                                                                  |
|--------------|------------|-----------------|-------------------|----------------------|--------------------------------------------------------------------------------------------------------------------------------------------------------------------------------------------------------------------------------------------------------------------------------------------------------------------------------------------------------------------------------------------------------------------------------------------------------------------------------------------------------------------------------------------------------------------------------------------------------------------------|
| DRC1         | Q229S1     | TTHERM_01345750 | 291-734           | 292-826              | <ul style="list-style-type: none"> <li>The C-terminal of DRC1 (residue 291-734) modelled using Coot based on <i>C. reinhardtii</i> structure [1].</li> <li>The predicted structure of the linker domain in DRC1 and DRC2 using AlphaFold2 Multimer, revealing that they form a coiled-coil protein. The linker domain of DRC1 folds back in a manner that accurately aligns with our map.</li> <li>The cross-link data showed links between DRC1 and DRC2, indicating dimerization.</li> </ul>                                                                                                                           |
| DRC2         | Q24DJ0     | TTHERM_00971830 | 277-480           | 278-576              |                                                                                                                                                                                                                                                                                                                                                                                                                                                                                                                                                                                                                          |
| DRC3         | I7MG46     | TTHERM_00316370 | —                 | 31-575               | <ul style="list-style-type: none"> <li>The subtomogram average showed that DRC3 is missing in <i>drc3</i> mutant [2].</li> <li>The AlphaFold2 model of DRC3 shows a unique arrangement of the LRR and 3-helical bundle domains, which corresponds precisely to our cryo-EM map.</li> <li>Localization of DRC3 aligns with the positions of the N- and C-termini of DRC3 that were identified using strep-Au labels and cryo-electron tomography (cryo-ET) [3].</li> </ul>                                                                                                                                                |
| DRC4A        | Q23YW7     | TTHERM_00857910 | 293-464           | 1-294                | <ul style="list-style-type: none"> <li>The baseplate domain is modelled using Coot and the side chains fitted well in our density map.</li> <li>DRC4A cross link with DRC4B, indicating heterodimer formation.</li> <li>Pull-down assay showed DRC4A and DRC4B interact with each other.</li> <li>AlphaFold2 multimer prediction revealed that the structure of DRC4A and DRC4B form a coiled-coil protein, which is consistent with our cryo-EM density. However, the structure of DRC4A-A and DRC4B-B do not match with our map.</li> </ul>                                                                            |
| DRC4B        | I7LT80     | TTHERM_00649240 | 292-472           | 1-293                |                                                                                                                                                                                                                                                                                                                                                                                                                                                                                                                                                                                                                          |
| DRC5         | Q24C31     | TTHERM_00697450 | —                 | 1-461                | <ul style="list-style-type: none"> <li>The AlphaFold2 predicted model of DRC5 precisely matches with the LRR density in our map, which surrounds DRC1,2,4.</li> <li>The AlphaFold2 multimer prediction showed that DRC5 interacts with DRC1,2 at the expected location, as indicated by our cryo-EM maps.</li> <li>The C-terminus of DRC5 in the atomic model aligns with the location of the C-terminal strep-Au tag [4, 5].</li> </ul>                                                                                                                                                                                 |
| DRC6C        | Q24CL2     | TTHERM_01220370 | —                 | 1-345                | <ul style="list-style-type: none"> <li>DRC5 and DRC6 lost in <i>drc5</i> mutants [6-8].</li> <li>The region close to the top part of the linker domain is lost in subtomogram average map of <i>drc5</i> mutant [6].</li> <li>DRC6C showed a cross-link with DRC12 in the top part of the linker domain.</li> <li>The AlphaFold2 multimer prediction of DRC12 and DRC6 is consistent with our cryo-EM map and cross-link data.</li> <li>The DRC6 in localize in the top part of the linker domain and interacts with adjacent B-tubule which is consistent with our subtomogram average and previous studies.</li> </ul> |
| DRC7         | I7MLZ4     | TTHERM_00473320 | —                 | 1-852                | <ul style="list-style-type: none"> <li>DRC7 is missing in the central part of the N-DRC structure in <i>drc7</i> mutant [4].</li> <li>DRC7 cross-links with the linker domain of DRC9/10.</li> <li>The linker domain of DRC9/10 is missing in <i>drc7</i> mutant[4].</li> <li>DRC7 cross-links with DRC3.</li> <li>The AlphaFold2 multimer prediction showed DRC7 interact with DRC3 and DRC9/10.</li> </ul>                                                                                                                                                                                                             |

|         |        |                  |         |                     |                                                                                                                                                                                                                                                                                                                                                                                                                                                                                                                                                                                                                                                                                                                                                                                                                                                                                                                                 |
|---------|--------|------------------|---------|---------------------|---------------------------------------------------------------------------------------------------------------------------------------------------------------------------------------------------------------------------------------------------------------------------------------------------------------------------------------------------------------------------------------------------------------------------------------------------------------------------------------------------------------------------------------------------------------------------------------------------------------------------------------------------------------------------------------------------------------------------------------------------------------------------------------------------------------------------------------------------------------------------------------------------------------------------------|
| DRC8    | W7WX86 | TTHERM_001232262 | —       | 1-185               | <ul style="list-style-type: none"> <li>• DRC8 is missing in <i>drc11</i> mutant [4].</li> <li>• The subtomogram average showed that DRC11 density in the N-DRC proximal lobe is missing in <i>drc11</i> mutant [4].</li> <li>• The AlphaFold2 multimer and Hdock prediction showed that two copies of DRC8 can interact with DRC11.</li> <li>• Assembliner localized DRC8 close to DRC11 in our cryo-EM density map, which is highly consistent with AlphaFold2 multimer and Hdock prediction.</li> <li>• DRC11A cross-links with the N-terminal domain of DRC4B.</li> </ul>                                                                                                                                                                                                                                                                                                                                                    |
| DRC11A  | I7LWE3 | TTHERM_00151820  |         | 1-862               |                                                                                                                                                                                                                                                                                                                                                                                                                                                                                                                                                                                                                                                                                                                                                                                                                                                                                                                                 |
| DRC9    | Q23S05 | TTHERM_00625950  | —       | 1-372               | <ul style="list-style-type: none"> <li>• Our cryo-EM map revealed an uncharacterized coiled-coil density which interacts with DRC3.</li> <li>• AlphaFold2 multimer of DRC9/10 and DRC3 showed DRC3 interacts with DRC9/10 which is consistent with our map.</li> <li>• AlphaFold2 multimer model of DRC9/10 is consistent with coiled-coil density in our map.</li> <li>• The N-terminus of DRC9/10 precisely fits in the N-DRC bulb density.</li> <li>• DRC9/10 cross-links with DRC7.</li> </ul>                                                                                                                                                                                                                                                                                                                                                                                                                              |
| DRC10   | A4VD15 | TTHERM_00535929  |         | 1-434               |                                                                                                                                                                                                                                                                                                                                                                                                                                                                                                                                                                                                                                                                                                                                                                                                                                                                                                                                 |
| DRC12   | Q22RH5 | TTHERM_00016120  | —       | 1-187               | <ul style="list-style-type: none"> <li>• Our cryo-EM map showed unidentified coiled-coil density which interacts with DRC1/2 and DRC6.</li> <li>• DRC12 cross-links with DRC1 and DRC6.</li> <li>• AlphaFold2 model of DRC12 matches with the coiled-coil density in our cryo-EM map.</li> <li>• The positive charge of flexible loops in the top part of the linker domain of DRC12 is consistent with the proposed electrostatic interaction between the N-DRC and polyglutamylated tubulin [9].</li> <li>• BioID result showed that DRC12 is biotinylated when DRC1-HA-BirA* and DRC2-HA-BirA* tagged as baits.</li> <li>• The RNA expression of DRC12 from different human tissues correlates well with that of DRC1 and DRC2.</li> </ul>                                                                                                                                                                                   |
| CCDC96  | I7M6D6 | TTHERM_00529650  | 636-777 | 104-408,<br>442-626 | <ul style="list-style-type: none"> <li>• CCDC96 and CCDC113 interact with each other [10].</li> <li>• Subtomogram average showed that CCDC96/113 are localized between the N-DRC and RS3 and IDAg.</li> <li>• CCDC96 cross-links with CCDC113.</li> <li>• CCDC96 cross-links with CFAP91.</li> <li>• AlphaFold2 multimer prediction showed that CCDC96 and CCDC113 form a coiled-coil and fold back close to the N-terminal region, which is highly consistent with our cryo-EM map.</li> <li>• The N-terminal domain of CCDC96 is not conserved and localize in top part of the N-DRC complex.</li> <li>• CFAP337 cross-link with CCDC96.</li> <li>• CFAP337 is missing in MS/MS of CCDC96-KO cells.</li> <li>• The AlphaFold2 predicted structure of CFAP337 match with two WD domains in our map.</li> <li>• CFAP337B (UniProtID I7MKT5), paralog of CFAP337A is biotinylated when DRC3-HA-BirA* tagged as baits.</li> </ul> |
| CCDC113 | Q22KK0 | TTHERM_00312810  | 212-355 | 1-202               |                                                                                                                                                                                                                                                                                                                                                                                                                                                                                                                                                                                                                                                                                                                                                                                                                                                                                                                                 |
| CFAP337 | I7MM07 | TTHERM_00475060  |         | 36-865              |                                                                                                                                                                                                                                                                                                                                                                                                                                                                                                                                                                                                                                                                                                                                                                                                                                                                                                                                 |
| CCDC39  | Q23BW0 | TTHERM_00227220  | 533-763 | 101-308,<br>530-310 | <ul style="list-style-type: none"> <li>• CCDC39 cross-links with CCDC40 and DRC2.</li> <li>• High resolution allowed us to model a short segment of the CCDC39/40 coiled coil using Coot and fit the side chains based on <i>C. reinhardtii</i> [1].</li> <li>• CCDC40 cross-links with CFAP91 and DRC4B.</li> </ul>                                                                                                                                                                                                                                                                                                                                                                                                                                                                                                                                                                                                            |
| CCDC40  | Q233L0 | TTHERM_00391400  | 516-698 | 53-257,<br>259-480  |                                                                                                                                                                                                                                                                                                                                                                                                                                                                                                                                                                                                                                                                                                                                                                                                                                                                                                                                 |
| CFAP91  | I7LWP7 | TTHERM_00578560  | 169-347 | —                   | <ul style="list-style-type: none"> <li>• High resolution allowed us to model a short segment of the CFAP91 using Coot and fit the side chains based on <i>C. reinhardtii</i> [1].</li> <li>• CFAP91 cross-links with CCDC96 and CCDC40.</li> </ul>                                                                                                                                                                                                                                                                                                                                                                                                                                                                                                                                                                                                                                                                              |
| CFAP20  | Q22NU3 | TTHERM_00418580  | 1-187   | —                   | <ul style="list-style-type: none"> <li>• High resolution allowed us to model complete CFAP20.</li> </ul>                                                                                                                                                                                                                                                                                                                                                                                                                                                                                                                                                                                                                                                                                                                                                                                                                        |

|          |        |                 |   |                                  |                                                                                                                                                                                                                                                                                                                                                                                                                                                                                                                                                                                                                       |
|----------|--------|-----------------|---|----------------------------------|-----------------------------------------------------------------------------------------------------------------------------------------------------------------------------------------------------------------------------------------------------------------------------------------------------------------------------------------------------------------------------------------------------------------------------------------------------------------------------------------------------------------------------------------------------------------------------------------------------------------------|
| CFAP57A  | Q234G8 | TTHERM_00105300 | — | 1-883,<br>909-1147,<br>1161-1230 | <ul style="list-style-type: none"> <li>• Cross-links between CFAP57A and CFAP57C indicate that they form a heterodimer.</li> <li>• The AlphaFold2 multimer model of CFAP57A and CFAP57C forms coiled-coiled with the WD domain, which exactly match with the coiled-coiled and WD40 domain density in our cryo-EM map.</li> <li>• The density of CFAP57 is found near CFAP337, which is consistent with previous study indicating the absence of CFAP337 in CFAP57-KO cells [11].</li> <li>• CFAP57A was highly biotinylated in cells expressing CCDC96-HA-BirA* or CCDC113-HA-BirA* fusion proteins [10].</li> </ul> |
| CFAP57C  | W7WWA2 | TTHERM_00052490 | — | 1-872,<br>898-1137,<br>1151-1209 |                                                                                                                                                                                                                                                                                                                                                                                                                                                                                                                                                                                                                       |
| Calm 7-2 | I7MDA9 | TTHERM_00549500 | — | 1-202                            | <ul style="list-style-type: none"> <li>• DRC6C cross-links with Calmodulin 7-2 protein.</li> <li>• AlphaFold2 model of Calmodulin 7-2 matches with small globular densities in our map.</li> <li>• AlphaFold2 multimer model of Calmodulin 7-2/DRC9/10 showed two copies of Calmodulin 7-2 interact with DRC9/10 which is consistent with our cryo-EM map.</li> <li>• Previous study showed that CaM-like protein co-purified with N-DRC providing evidence for the presence of Calmodulin 7-2 in the N-DRC [5].</li> </ul>                                                                                           |

**Supplementary Table 2.** The homologs of N-DRC subunits of *T. thermophila* and human based on N-DRC subunits of *C. reinhardtii*. The emPAI score (no-salt treatment) and salt resistance were calculated from the mass spectrometry data of *T. thermophila* axonemes on DataDryad [12].

| DRC subunits   | <i>C. reinhardtii</i> | Human      | <i>T. thermophila</i> | Resistant to salt | emPAI score |
|----------------|-----------------------|------------|-----------------------|-------------------|-------------|
| DRC1           | P0DL09                | Q96MC2     | Q229S1                | Yes               | 1.457       |
| DRC2           | A8JB22                | Q8IXS2     | Q24DJ0                | Yes               | 3.253       |
| DRC3           | A8IVX2                | Q9H069     | I7MG46                | Yes               | 3.685       |
| DRC4A          | Q7XJ96                | O95995     | Q23YW7                | Yes               | 2.499       |
| DRC4B          | Q7XJ96                | O95995     | I7LT80                | Yes               | 3.567       |
| DRC5           | A8HMZ4                | Q5JU00     | Q24C31                | Yes               | 1.521       |
| DRC6A          | A8JHD7                | Q8NEE6     | I7M1R2                | Yes               | 1.188       |
| DRC6B          | A8JHD7                | Q8NEE6     | I7MIQ9                | No                | 0.202       |
| DRC6C          | A8JHD7                | Q8NEE6     | Q24CL2                | Yes               | 1.991       |
| DRC7           | A0A2K3CXC4            | Q8IY82     | I7MLZ4                | Yes               | 2.389       |
| DRC8           | A8J3A0                | Q5VUJ9     | W7WX86                | Yes               | 1.823       |
| DRC9           | A0A2K3E6B1            | Q9H095     | Q23S05                | Yes               | 2.442       |
| DRC10          | A8J0N6                | Q96DY2     | A4VD15                | Yes               | 1.883       |
| DRC11A         | A0A2K3DJI6            | Q86XH1     | I7LWE3                | Yes               | 2.326       |
| DRC11B         | A0A2K3DJI6            | Q86XH1     | W7XI81                | No                | 0.316       |
| DRC12          | A0A2K3DW17            | Q494R4     | Q22RH5                | Yes               | 2.401       |
| CFAP337A       | A0A2K3DIJ7            | A0A804HJG6 | I7MM07                | No                | 1.694       |
| CFAP337B       | A0A2K3DIJ7            | A0A804HJG6 | I7MKT5                | No                | 3.399       |
| CCDC96         | A0A2K3DWC0            | Q2M329     | I7M6D6                | Yes               | 1.697       |
| CCDC113        | A0A2K3CQ22            | Q9H0I3     | Q22KK0                | Yes               | 3.358       |
| CCDC39         | A0A0A1H1F6            | Q9UFE4     | Q23BW0                | No                | 3.230       |
| CCDC40         | A0A0A1GYE8            | Q4G0X9     | Q233L0                | No                | 2.933       |
| CFAP91         | A0A2K3DJU2            | Q7Z4T9     | I7LWP7                | No                | 0.319       |
| CFAP20         | A8IU92                | Q9Y6A4     | Q22NU3                | No                | 0.648       |
| CFAP57A        | A0A2K3DTF5            | A0A087WVY5 | Q234G8                | No                | 1.225       |
| CFAP57C        | A0A2K3DV21            | A0A087WVY5 | W7WWA2                | No                | 0.924       |
| CFAP57B        | A0A2K3DRH4            | A0A087WVY5 | Q23CU1                | No                | 0.609       |
| CFAP57D        |                       | A0A087WVY5 | Q22N63                | No                | 0.402       |
| Calmodulin 7-2 | P04352                | P0DP25     | I7MDA9                | Yes               | 1.427       |



**Supplementary Table 3.** Intermolecular cross link data identified from N-DRC.

| Protein 1 | UniProtID | Residue number | Protein 2      | UniProtID | Residue number |
|-----------|-----------|----------------|----------------|-----------|----------------|
| CCDC39    | Q23BW0    | 660            | CFAP91         | I7LWP7    | 218            |
| CCDC39    | Q23BW0    | 613            | DRC2           | Q24DJ0    | 342            |
| CFAP91    | I7LWP7    | 343            | CCDC96         | I7M6D6    | 750            |
| CFAP91    | I7LWP7    | 347            | CCDC96         | I7M6D6    | 750            |
| CFAP91    | I7LWP7    | 343            | CCDC40         | Q233L0    | 542            |
| CFAP91    | I7LWP7    | 343            | CCDC40         | Q233L0    | 531            |
| DRC4A     | Q23YW7    | 123            | DRC1           | Q229S1    | 150            |
| DRC12     | Q22RH5    | 83             | DRC1           | Q229S1    | 138            |
| DRC1      | Q229S1    | 178            | DRC4A          | Q23YW7    | 149            |
| DRC1      | Q229S1    | 180            | DRC2           | Q24DJ0    | 172            |
| DRC1      | Q229S1    | 258            | DRC2           | Q24DJ0    | 247            |
| CCDC96    | I7M6D6    | 665            | CCDC113        | Q22KK0    | 245            |
| CCDC96    | I7M6D6    | 697            | CCDC113        | Q22KK0    | 274            |
| CCDC96    | I7M6D6    | 679            | CCDC113        | Q22KK0    | 259            |
| CCDC113   | Q22KK0    | 346            | CCDC96         | I7M6D6    | 761            |
| CCDC113   | Q22KK0    | 108            | CCDC96         | I7M6D6    | 532            |
| CCDC113   | Q22KK0    | 52             | CCDC96         | I7M6D6    | 532            |
| CCDC113   | Q22KK0    | 152            | CCDC96         | I7M6D6    | 573            |
| DRC4B     | I7LT80    | 332            | CCDC40         | Q233L0    | 542            |
| DRC4B     | I7LT80    | 322            | DRC4A          | Q23YW7    | 315            |
| DRC4B     | I7LT80    | 83             | DRC4A          | Q23YW7    | 73             |
| DRC4B     | I7LT80    | 201            | DRC4A          | Q23YW7    | 194            |
| DRC4B     | I7LT80    | 55             | DRC11A         | I7LWE3    | 551            |
| DRC4B     | I7LT80    | 56             | DRC11A         | I7LWE3    | 562            |
| DRC4B     | I7LT80    | 378            | DRC2           | Q24DJ0    | 367            |
| DRC4B     | I7LT80    | 261            | DRC2           | Q24DJ0    | 262            |
| DRC4B     | I7LT80    | 218            | DRC2           | Q24DJ0    | 255            |
| DRC10     | A4VD15    | 346            | DRC7           | I7MLZ4    | 250            |
| DRC3      | I7MG46    | 377            | DRC7           | I7MLZ4    | 566            |
| DRC3      | I7MG46    | 355            | DRC7           | I7MLZ4    | 221            |
| CFAP91    | I7LWP7    | 343            | DRC4B          | I7LT80    | 332            |
| DRC2      | Q24DJ0    | 228            | DRC4B          | I7LT80    | 233            |
| CFAP337   | I7MM07    | 1004           | CCDC96         | I7M6D6    | 533            |
| CFAP57A   | Q234G8    | 812            | CFAP57C        | W7WWA2    | 802            |
| CFAP57A   | Q234G8    | 1258           | CFAP57C        | W7WWA2    | 1266           |
| DRC6C     | Q24CL2    | 209            | DRC12          | Q22RH5    | 48             |
| DRC6C     | Q24CL2    | 222            | Calmodulin 7-2 | I7MDA9    | 63             |

**Supplementary Table 4.** Intramolecular cross-links identified from the N-DRC subunits.

| Protein 1 | UniProtID | Residue Number | Protein 2 | UniProtID | Residue number |
|-----------|-----------|----------------|-----------|-----------|----------------|
| DRC4A     | Q23YW7    | 100            | DRC4A     | Q23YW7    | 93             |
| DRC5      | Q24C31    | 397            | DRC5      | Q24C31    | 387            |
| DRC5      | Q24C31    | 91             | DRC5      | Q24C31    | 83             |
| DRC1      | Q229S1    | 187            | DRC1      | Q229S1    | 180            |
| CCDC96    | I7M6D6    | 351            | CCDC96    | I7M6D6    | 289            |
| CCDC96    | I7M6D6    | 368            | CCDC96    | I7M6D6    | 255            |
| CCDC96    | I7M6D6    | 380            | CCDC96    | I7M6D6    | 375            |
| CCDC96    | I7M6D6    | 351            | CCDC96    | I7M6D6    | 289            |
| CCDC96    | I7M6D6    | 255            | CCDC96    | I7M6D6    | 375            |
| CCDC96    | I7M6D6    | 255            | CCDC96    | I7M6D6    | 380            |
| CCDC96    | I7M6D6    | 263            | CCDC96    | I7M6D6    | 339            |
| CCDC96    | I7M6D6    | 380            | CCDC96    | I7M6D6    | 269            |
| CCDC96    | I7M6D6    | 255            | CCDC96    | I7M6D6    | 375            |
| CCDC96    | I7M6D6    | 263            | CCDC96    | I7M6D6    | 339            |
| CCDC96    | I7M6D6    | 351            | CCDC96    | I7M6D6    | 289            |
| CCDC113   | Q22KK0    | 108            | CCDC113   | Q22KK0    | 100            |
| CCDC113   | Q22KK0    | 52             | CCDC113   | Q22KK0    | 108            |
| CCDC113   | Q22KK0    | 280            | CCDC113   | Q22KK0    | 284            |
| DRC11A    | I7LWE3    | 309            | DRC11A    | I7LWE3    | 313            |
| DRC11A    | I7LWE3    | 559            | DRC11A    | I7LWE3    | 562            |
| DRC11A    | I7LWE3    | 831            | DRC11A    | I7LWE3    | 562            |
| DRC7      | I7MLZ4    | 488            | DRC7      | I7MLZ4    | 464            |
| DRC7      | I7MLZ4    | 433            | DRC7      | I7MLZ4    | 464            |
| DRC7      | I7MLZ4    | 576            | DRC7      | I7MLZ4    | 681            |
| DRC7      | I7MLZ4    | 576            | DRC7      | I7MLZ4    | 566            |
| DRC10     | A4VD15    | 277            | DRC10     | A4VD15    | 285            |
| DRC10     | A4VD15    | 239            | DRC10     | A4VD15    | 246            |
| DRC3      | I7MG46    | 386            | DRC3      | I7MG46    | 392            |
| DRC3      | I7MG46    | 463            | DRC3      | I7MG46    | 302            |
| DRC3      | I7MG46    | 53             | DRC3      | I7MG46    | 88             |
| DRC3      | I7MG46    | 119            | DRC3      | I7MG46    | 27             |
| DRC3      | I7MG46    | 385            | DRC3      | I7MG46    | 392            |

**Supplementary Table 5.** Mass spectrometry-based identification of ciliary proteins biotinylated in cells expressing the C-terminally -HA-BirA\* tagged DRC proteins. Numbers X/Y: (X) number of all identified peptides (in a Mascot program, all significant matches), (Y) number of all unique peptide sequences (in a Mascot program, significant sequences).

|                   |                  | Experiment 1 |                       |                       | Experiment 2 |                       |                       |                       | Experiment 3 |                       |                       |
|-------------------|------------------|--------------|-----------------------|-----------------------|--------------|-----------------------|-----------------------|-----------------------|--------------|-----------------------|-----------------------|
|                   |                  | WT           | DRC1-<br>HA-<br>BirA* | DRC2-<br>HA-<br>BirA* | WT           | DRC1-<br>HA-<br>BirA* | DRC2-<br>HA-<br>BirA* | DRC3-<br>HA-<br>BirA* | WT           | DRC7-<br>HA-<br>BirA* | DRC9-<br>HA-<br>BirA* |
| DRC1              | TTHERM_01345750  | 1/1          | 31/20                 | 16/14                 | 0            | 9/7                   | 10/7                  | 0                     | 0            | 0                     | 0                     |
| DRC2              | TTHERM_00971830  | 0            | 17/10                 | 12/10                 | 0            | 11/7                  | 26/15                 | 2/2                   | 0            | 0                     | 0                     |
| DRC3              | TTHERM_00316370  | 0            | 18/10                 | 17/11                 | 0            | 3/2                   | 6/4                   | 17/11                 | 0            | 0                     | 0                     |
| DRC4A             | TTHERM_00857910  | 2/2          | 23/14                 | 20/11                 | 0            | 10/9                  | 21/13                 | 2/2                   | 0            | 1/1                   | 0                     |
| DRC4B             | TTHERM_00649240  | 3/1          | 23/12                 | 23/13                 | 0            | 5/4                   | 10/8                  | 2/2                   | 0            | 1/1                   | 2/1                   |
| DRC5              | TTHERM_00697450  | 0            | 0                     | 1/1                   | 0            | 0                     | 1/1                   | 0                     | 0            | 2/2                   | 0                     |
| DRC6A             | TTHERM_00339720  | 0            | 0                     | 0                     | 0            | 0                     | 1/1                   | 0                     | 0            | 0                     | 0                     |
| DRC6B             | TTHERM_00522350  | 0            | 0                     | 0                     | 0            | 0                     | 0                     | 0                     | 0            | 0                     | 0                     |
| DRC6C             | TTHERM_01220370  | 0            | 17/7                  | 6/4                   | 0            | 0                     | 1/1                   | 0                     | 0            | 0                     | 0                     |
| DRC7              | TTHERM_00473320  | 0            | 19/11                 | 16/14                 | 0            | 3/2                   | 3/3                   | 1/1                   | 0            | 43/25                 | 0                     |
| DRC8              | TTHERM_001232262 | 0            | 0                     | 0                     | 0            | 1/1                   | 0                     | 0                     | 0            | 0                     | 0                     |
| DRC9              | TTHERM_00625950  | 6/4          | 12/10                 | 16/8                  | 0            | 1/1                   | 7/6                   | 3/3                   | 0            | 0                     | 7/4                   |
| DRC10             | TTHERM_00535929  | 0            | 0                     | 0                     | 0            | 6/4                   | 13/9                  | 3/3                   | 0            | 0                     | 0                     |
| DRC11A            | TTHERM_00151820  | 2/2          | 13/8                  | 14/12                 | 0            | 0                     | 0                     | 0                     | 0            | 0                     | 0                     |
| DRC11B            | TTHERM_000268319 | 0            | 0                     | 0                     | 0            | 0                     | 1/1                   | 2/2                   | 1/1          | 1/1                   | 0                     |
| DRC12             | TTHERM_00016120  | 0            | 0                     | 0                     | 0            | 3/2                   | 1/1                   | 0                     | 0            | 0                     | 0                     |
| CCDC96            | TTHERM_00529650  | 1/1          | 29/18                 | 8/6                   | 0            | 1/1                   | 0                     | 0                     | 0            | 0                     | 0                     |
| CCDC113           | TTHERM_00312810  | 4/4          | 27/16                 | 17/11                 | 0            | 45/20                 | 1/1                   | 1/1                   | 0            | 0                     | 0                     |
| CFAP337A          | TTHERM_00475060  | 0            | 3/2                   | 1/1                   | 0            | 0                     | 0                     | 0                     | 0            | 0                     | 0                     |
| CFAP337B          | TTHERM_00218510  | 0            | 1/1                   | 0                     | 0            | 0                     | 0                     | 2/2                   | 0            | 0                     | 0                     |
| CFAP91            | TTHERM_00578560  | 0            | 4/3                   | 6/4                   | 0            | 0                     | 0                     | 0                     | 0            | 0                     | 0                     |
| CFAP57A           | TTHERM_00105300  | 0            | 45/26                 | 24/18                 | 0            | 29/21                 | 7/6                   | 0                     | 0            | 0                     | 0                     |
| CFAP57B           | TTHERM_00052490  | 0            | 4/3                   | 2/2                   | 0            | 0                     | 0                     | 0                     | 0            | 0                     | 0                     |
| CFAP57C           | TTHERM_00214710  | 0            | 0                     | 0                     | 0            | 0                     | 0                     | 0                     | 0            | 0                     | 0                     |
| CFAP57D           | TTHERM_000681920 | 0            | 0                     | 0                     | 0            | 32/23                 | 13/9                  | 0                     | 0            | 0                     | 0                     |
| CCDC39            | TTHERM_00227220  | 0            | 2/2                   | 2/2                   | 0            | 0                     | 0                     | 0                     | 0            | 0                     | 0                     |
| CCDC40            | TTHERM_00391400  | 0            | 3/2                   | 0                     |              | 0                     | 0                     | 0                     | 0            | 0                     | 0                     |
| CFAP20            | TTHERM_00418580  | 11/7         | 25/7                  | 25/8                  | 0            | 1/1                   | 2/1                   | 0                     | 0            | 0                     | 0                     |
| Calmodulin<br>7-2 | TTHERM_00549500  | 1/1          | 3/3                   | 7/3                   | 0            | 0                     | 2/2                   | 1/1                   | 0            | 0                     | 0                     |

**Supplementary Table 6.** Normalized transcript per million (nTPM) RNA expression levels of DRCs in different human tissues obtained from The Human Protein Atlas on December 20, 2022

| Tissue            | DRC1 | DRC2 | DRC3 | DRC4 | DRC5 | DRC6 | DRC7 | DRC8 | DRC9 | DRC10 | DRC11 | DRC12 |
|-------------------|------|------|------|------|------|------|------|------|------|-------|-------|-------|
| Cerebellum        | 2.7  | 0.0  | 1.6  | 10.0 | 6.2  | 0.2  | 1.2  | 14.4 | 8.4  | 2.7   | 18.1  | 1.4   |
| Choroid plexus    | 2.7  | 3.4  | 18.7 | 12.3 | 1.3  | 4.4  | 11.4 | 26.7 | 25.2 | 8.4   | 22.7  | 10.3  |
| Fallopian Tube    | 11.1 | 26.6 | 61.4 | 18.9 | 14.4 | 5.0  | 21.1 | 36.1 | 52.8 | 22.0  | 11    | 39.3  |
| Lung              | 1.5  | 2.9  | 5.3  | 7.1  | 1.4  | 0.5  | 1.9  | 12.6 | 9.1  | 2.6   | 2.7   | 3.1   |
| Midbrain          | 1.9  | 2.3  | 11.4 | 10.1 | 3.3  | 2.2  | 9.3  | 16.9 | 19.8 | 5.7   | 27    | 7.3   |
| Parathyroid gland | 2.8  | 1.4  | 6.6  | 16.3 | 0.0  | 0.5  | 0.7  | 15.4 | 4.4  | 5.1   | 1.4   | 0.0   |
| Pituitary gland   | 3.3  | 2.1  | 9.9  | 14.1 | 0.5  | 0.6  | 1.0  | 8.5  | 6.1  | 3.9   | 10.3  | 3.2   |
| Testis            | 1.8  | 37.3 | 11.9 | 16.8 | 30   | 20.7 | 46.1 | 28   | 43.9 | 44.3  | 4.5   | 20.8  |

**Supplementary Table 7.** Primers used in this study.

| Gene                                                                                                     | Primer's name        | Primers' nucleotide sequence                                    |
|----------------------------------------------------------------------------------------------------------|----------------------|-----------------------------------------------------------------|
| expression of C-terminally –HA-BirA* tagged DRC proteins under the control of respective native promoter |                      |                                                                 |
| <i>DRC1</i>                                                                                              | DRC1-Bir-cod-MluI-F  | AAAT <b>ACGCGT</b> GAGGAAGCAAGAAAATAACTTCTTTT G                 |
|                                                                                                          | DRC1-Bir-cod-BamHI-R | AATT <b>GGATCCT</b> CTTTGTCCTTAATCTATATTAATGAGTCTTG             |
|                                                                                                          | DRC1-Bir-3UTR-PstI-F | AAAT <b>CTGCAGC</b> CTACTCTAAAAAAATTATTCTCCTGATAAAA             |
|                                                                                                          | DRC1-Bir-3UTR-XhoI-R | AATT <b>CTCGAGA</b> ATCTTCAAAAAGTAAGTAGATTGATAGATAG             |
| <i>DRC2</i>                                                                                              | DRC2-Bir-cod-MluI-F  | AAAT <b>ACGCGT</b> CATGCCATAATAAGAATAGAAAGTAGGA                 |
|                                                                                                          | DRC2-Bir-cod-BamHI-R | AATT <b>GGATCC</b> CTAGAATGGAGGAGCTCTTTATCC                     |
|                                                                                                          | DRC2-Bir-3UTR-PstI-F | AAAT <b>CTGCAGC</b> ACTCTATCCATTAATTACATTTGTATCTG               |
|                                                                                                          | DRC2-Bir-3UTR-XhoI-R | AATT <b>CTCGAGC</b> GAACTTTTGTTGAGTTCAAAAG                      |
| <i>DRC3</i>                                                                                              | DRC3-Bir-cod-MluI-F  | AATT <b>ACGCGT</b> GGGAGAAAGAAGCTGCTAATG                        |
|                                                                                                          | DRC3-Bir-cod-BamHI-R | AATT <b>GGATCC</b> ATTTTCATGATCGGATTCATCATCTC                   |
|                                                                                                          | DRC3-Bir-3UTR-PstI-F | AATT <b>CTGCAG</b> AGATCTATCTATCTATTGACTTAATTGATTTGT            |
|                                                                                                          | DRC3-Bir-3UTR-XhoI-R | AATT <b>CTCGAG</b> ATCGATCTCAATAATGTAGATTTACCGACGGA AGGG        |
| <i>DRC7</i>                                                                                              | DRC7-Bir-cod-MluI-F  | AATT <b>ACGCGT</b> CTCATTACCCTGCTAATGAATAGATTC                  |
|                                                                                                          | DRC7-Bir-cod-BamHI-R | AATT <b>GGATCC</b> CTTTCTATGTAAGGCTGCTAAACG                     |
|                                                                                                          | DRC7-Bir-3UTR-PstI-F | AATT <b>CTGCAGC</b> GCTAGATAAAAAATATTAGATTGGGCA                 |
|                                                                                                          | DRC7-Bir-3UTR-XhoI-R | AATT <b>CTCGAG</b> CTCAGATGATTACAAATAACTCCTAGTG                 |
| <i>DRC9</i>                                                                                              | DRC9-Bir-cod-MluI-F  | AATT <b>ACGCGT</b> AGATCTGTGTAGACTGTTTAAAGAAAATCCTGA            |
|                                                                                                          | DRC9-Bir-cod-BamHI-R | AATT <b>GGATCC</b> TTTCTTTTCTTTTTCCTTTTGCCTTTCTTTCTC            |
|                                                                                                          | DRC9-Bir-3UTR-PstI-F | AATT <b>CTGCAG</b> GTTTGTACAATTTAAATAGTATTCAAACAAAGA            |
|                                                                                                          | DRC9-Bir-3UTR-XhoI-R | AATT <b>CTCGAG</b> AAGCTTGAAGTTAAATCTTCTATCTCAAATTCCATG         |
| Overexpression of DRC proteins under the control of MTT1 promoter                                        |                      |                                                                 |
| <i>DRC3</i>                                                                                              | DRC3-oex-MluI-F      | AATT <b>ACGCGT</b> <u>TATG</u> TCGAATTACATTAGCAACTACG           |
|                                                                                                          | DRC3-oex-BamHI-R     | AATT <b>GGATCC</b> ATTTTCATGATCGGATTCATCATCTC                   |
| <i>DRC4A</i>                                                                                             | DRC4A-oex-MluI-F     | AATT <b>ACGCGT</b> <u>TATG</u> CCTCCAAAAAAGCTAAAGG              |
|                                                                                                          | DRC4A-oex-BamHI-R    | AATT <b>GGATCC</b> AGAAGAGACTAAACCAGCAGG                        |
| <i>DRC4B</i>                                                                                             | DRC4B-oex-MluI-F     | AATT <b>ACGCGT</b> <u>TATG</u> TCGAAAGCTGCTAAAGC                |
|                                                                                                          | DRC4B-oex-BamHI-R    | AATT <b>GGATCC</b> ATCTGTGTTAGTAGGTACTAAAGGAT                   |
| <i>DRC11B</i>                                                                                            | DRC11B-oex-MluI-F    | AATT <b>ACGCGT</b> <u>TATG</u> TCTACGAATTTTATAATTTGCAATGGAAGCAG |
|                                                                                                          | DRC11B-oex-BamHI-R   | AATT <b>GGATCC</b> TTTCTTCTTTTCTTAGCTTTACCACC                   |



## **Supplementary Movies**

**Supplementary Movie 1:** The molecular architecture of the N-DRC on the DMT.

## References

1. Gui, M., et al., *Structures of radial spokes and associated complexes important for ciliary motility*. Nat Struct Mol Biol, 2021. **28**(1): p. 29-37.
2. Awata, J., et al., *DRC3 connects the N-DRC to dynein g to regulate flagellar waveform*. Mol Biol Cell, 2015. **26**(15): p. 2788-2800.
3. Song, K., et al., *In situ localization of N and C termini of subunits of the flagellar nexin-dynein regulatory complex (N-DRC) using SNAP tag and cryo-electron tomography*. J Biol Chem, 2015. **290**(9): p. 5341-53.
4. Gui, L., et al., *Scaffold subunits support associated subunit assembly in the Chlamydomonas ciliary nexin-dynein regulatory complex*. Proc Natl Acad Sci U S A, 2019. **116**(46): p. 23152-23162.
5. Oda, T., H. Yanagisawa, and M. Kikkawa, *Detailed structural and biochemical characterization of the nexin-dynein regulatory complex*. Mol Biol Cell, 2015. **26**(2): p. 294-304.
6. Heuser, T., et al., *The dynein regulatory complex is the nexin link and a major regulatory node in cilia and flagella*. J Cell Biol, 2009. **187**(6): p. 921-933.
7. Bower, R., et al., *The N-DRC forms a conserved biochemical complex that maintains outer doublet alignment and limits microtubule sliding in motile axonemes*. Mol Biol Cell, 2013. **24**(8): p. 1134-1152.
8. Lin, J., et al., *Building blocks of the nexin-dynein regulatory complex in Chlamydomonas flagella*. J Biol Chem, 2011. **286**(33): p. 29175-29191.
9. Kubo, T. and T. Oda, *Electrostatic interaction between polyglutamylated tubulin and the nexin-dynein regulatory complex regulates flagellar motility*. Mol Biol Cell, 2017. **28**(17): p. 2260-2266.
10. Bazan, R., et al., *Ccdc113/Ccdc96 complex, a novel regulator of ciliary beating that connects radial spoke 3 to dynein g and the nexin link*. PLoS Genet, 2021. **17**(3): p. e1009388.
11. Lin, J., et al., *FAP57/WDR65 targets assembly of a subset of inner arm dyneins and connects to regulatory hubs in cilia*. Mol Biol Cell, 2019. **30**(21): p. 2659-2680.
12. Bui, K.H., *Mass spectrometry of natively decorated doublet microtubule from Tetrahymena thermophila WT and mutants*. Dryad, 2021.
